# Supplementary material
Source: MDPI journal article supplement (https://www.mdpi.com/2571-9408/6/3/124)
Supplement: s1 [file s1 › heritage-2118917-supplementary.pdf]

## Supplementary Materials

### Khipu Structure

1932.08.01

**Table S1:** Representation of khipu 1932.08.01 cord structure. The cord colour pattern “solid” refers to the visible colour pattern of the cord.

| Pendant | S | ss | Material                     | Colour pattern | Pantone colour | Pantone colour | Pantone colour | Structure |
|---------|---|----|------------------------------|----------------|----------------|----------------|----------------|-----------|
| 1       |   |    | cotton                       | solid          | ivory          |                |                | Z(2s)     |
| 1       | 1 |    | cotton                       | solid          | 465            |                |                | Z(2s)     |
| 1       | 1 | 1  | cotton                       | solid          | 2311           |                |                | Z(2s)     |
| 1       | 2 |    | cotton                       | barber pole    | 468            | 5497           |                | Z         |
| 1       | 3 |    | cotton                       | mottled        | 7612           | 468            |                | Z         |
| 1       | 4 |    | cotton                       | mottled        | 464            | 468            |                | Z         |
| 1       | 5 |    | cotton                       | solid          | ivory          |                |                | Z         |
| 1       | 6 |    | cotton                       | mottled        | 464            | 468            |                | S(2z)     |
| 1       | 7 |    | cotton                       | solid          | 468            |                |                | Z(2s)     |
| 1       | 7 | 1  | cotton                       | barber pole    | 466            | 464            |                | Z(2s)     |
| 1       | 7 | 2  | cotton                       | mottled        | 5497           | 468            |                | S(2z)     |
| 1       | 7 | 3  | cotton                       | mottled        | 7612           | 468            |                | Z(2s)     |
| 1       | 8 |    | cotton                       | solid          | ivory          |                |                | Z(2s)     |
| 2       |   |    | cotton                       | solid          | ivory          |                |                | Z(2s)     |
| 2       | 1 |    | cotton                       | mottled        | 467            | 465            |                | Z(2s)     |
| 2       | 2 |    | cotton                       | barber pole    | 468            | 5497           |                | Z(2s)     |
| 2       | 3 |    | cotton                       | mottled        | 7612           | 468            |                | Z(2s)     |
| 2       | 4 |    | cotton (ecru) and wool (red) | mottled        | 468            | 201            |                | Z(2s)     |
| 2       | 5 |    | cotton                       | solid          | 468            |                |                | Z(2s)     |
| 2       | 6 |    | cotton                       | mottled        | 464            | 468            |                | Z(2s)     |
| 2       | 6 | 1  | cotton                       | solid          | ivory          |                |                | Z(2s)     |
| 2       | 7 |    | cotton                       | mottled        | 464            | 468            |                | Z(2s)     |
| 2       | 8 |    | cotton                       | solid?         | 468            |                | 464            | Z(2s)     |
| 2       | 8 | 1  | cotton                       | segmented wari | 464            | 468            |                | Z(2s)     |
| 2       | 8 | 2  | cotton                       | mottled        | 5497           | 468            |                | Z(2s)     |
| 2       | 8 | 3  | cotton                       | mottled        | 7612           | 468            |                | Z(2s)     |
| 2       | 9 |    | cotton                       | solid          | ivory          |                |                | Z(2s)     |
| 2       | 9 | 1  | cotton                       | segmented wari | 464            | 468            |                | Z(2s)     |
| 2       | 9 | 2  | cotton                       | barber pole    | 5497           | 468            |                | Z(2s)     |
| 2       | 9 | 3  | cotton                       | mottled        | 7612           | 468            |                | Z(2s)     |
| 3       |   |    | cotton                       | solid          | ivory          |                |                | Z(2s)     |
| 4       |   |    | cotton                       | solid          | ivory          |                |                | Z(2s)     |

\*Structure “Z(2s)” indicates a cord that has a final “Z” ply composed by two “s” plies. Deeper levels of ply are not indicated because they could not be collected consistently. For some cords it was only possible to collect the final ply direction. For a detailed explanation of the parenthetical notation to register cord structure see [58]

**Table S2:** Representation of khipu 1932.08.02 cord structure. The cord colour pattern “solid” refers to the visible colour pattern of the cord.

| Pendant | S | ss | Material                        | Colour pattern | Pantone colour | Pantone colour | Pantone colour | Structure |
|---------|---|----|---------------------------------|----------------|----------------|----------------|----------------|-----------|
| 1       |   |    | cotton                          | solid          | 4685           |                |                | Z(2s)     |
| 1       | 1 |    | cotton                          | solid          | 465            |                |                | Z(2s)     |
| 1       | 2 |    | cotton                          | solid          | ivory          |                |                | Z(2s)     |
| 1       | 3 |    | cotton                          | mottled        | 7613           | 4685           |                | Z(2s)     |
| 1       | 4 |    | cotton                          | mottled        | 465            | 443            |                | Z(2s)     |
| 1       | 5 |    | cotton (pink)<br>and wool (red) | mottled        | 7613           | 201            |                | Z(2s)     |
| 1       | 6 |    | cotton                          | mottled        | 465            | ivory          | 443            | Z(2s)     |
| 1       | 6 | 1  | cotton                          | segmented wari | ivory          | 7538           |                | Z(2s)     |
| 1       | 7 |    | cotton                          | solid          | 7538           |                |                | Z(2s)     |
| 1       | 7 | 1  | cotton                          | solid          | 7538           |                |                | Z(2s)     |
| 1       | 8 |    | cotton                          | solid          | 4685           |                |                | Z(2s)     |
| 1       | 8 | 1  | cotton                          | solid          | 465            |                |                | Z(2s)     |
| 1       | 8 | 2  | cotton                          | solid          | ivory          |                |                | Z(2s)     |
| 1       | 8 | 3  | cotton (pink)<br>and wool (red) | mottled        | 7613           | 201            |                | Z(2s)     |
| 1       | 8 | 4  | cotton                          | mottled        | 7613           | ivory          |                | Z(2s)     |
| 1       | 8 | 5  | cotton                          | mottled        | 465            | 443            |                | Z(2s)     |
| 1       | 8 | 6  | cotton                          | segmented wari | ivory          | 7613           |                | Z(2s)     |
| 1       | 8 | 7  | cotton                          | mottled        | 465            | 443            | ivory          | Z(2s)     |
| 1       | 8 | 7  | cotton                          | segmented wari | ivory          | 443            |                | Z(2s)     |
| 1       | 8 | 8  | cotton                          | mottled        | ivory          | 463            |                | Z(2s)     |
| 1       | 8 | 8  | wool                            | solid          | 201            |                |                | Z(2s)     |

\*Structure “Z(2s)” indicates a cord that has a final “Z” ply composed by two “s” plies. Deeper levels of ply are not indicated because they could not be collected consistently. For a detailed explanation of the parenthetical notation to register cord structure see [58]

### Samples

**Table S3.** Samples, colours and corresponding areas of wrapping on both khipus

| Sam-<br>ple | Sample<br>position | Colour | Corresponds to wrapping band on khipu ( <b>bold</b> if included in<br>XRF map <i>in situ</i> )                                                                                                                           |
|-------------|--------------------|--------|--------------------------------------------------------------------------------------------------------------------------------------------------------------------------------------------------------------------------|
|             |                    |        | 1932.08.0002                                                                                                                                                                                                             |
| 1           | P <sub>1S8S5</sub> | blue   | P <sub>1</sub> – Band 5, 6, 7<br><b>P<sub>1S8</sub> – Band 1, 3, 5</b>                                                                                                                                                   |
|             |                    |        | 1932.08.0001                                                                                                                                                                                                             |
|             |                    |        | <b>P<sub>1</sub> – Band 3, 5, 6, 7</b><br>P <sub>1S8</sub> – Band 1, 5<br>P <sub>2</sub> – Band 3, 5, 6, 7<br><b>P<sub>2S9</sub> – Band 1, 5</b><br>P <sub>3</sub> – Band 3, 5, 6, 7<br>P <sub>4</sub> – Band 3, 5, 6, 7 |
| 2           | P <sub>1S8S4</sub> | pink   | <b>P<sub>1</sub> – Band 1, 2, 3, 6</b><br><b>P<sub>1</sub> – Band 1</b>                                                                                                                                                  |

|   |                      |       |                                                                     |                                                                                                                                                                                                                                                                                 |
|---|----------------------|-------|---------------------------------------------------------------------|---------------------------------------------------------------------------------------------------------------------------------------------------------------------------------------------------------------------------------------------------------------------------------|
|   |                      |       | <b>P<sub>1S8</sub> – Band 4</b>                                     | P <sub>2</sub> – Band 1<br>P <sub>3</sub> – Band 1<br>P <sub>4</sub> – Band 1                                                                                                                                                                                                   |
| 3 | P <sub>1S8S4</sub>   | ivory | <b>P<sub>1</sub> – Band 2, 6</b><br><b>P<sub>1S8</sub> – Band 4</b> | <b>P<sub>1</sub> – Band 1, 3, 6</b><br>P <sub>1S7</sub> – Band 1, 3<br>P <sub>1S8</sub> – Band 2, 4<br>P <sub>2</sub> – Band 1, 3, 6<br><b>P<sub>2S8</sub> – Band 1</b><br><b>P<sub>2S9</sub> – Band 2, 4</b><br>P <sub>3</sub> – Band 1, 3, 6<br>P <sub>4</sub> – Band 1, 3, 6 |
| 4 | P <sub>1S8S8</sub>   | brown | <b>P<sub>1S8</sub> – Band 1</b>                                     |                                                                                                                                                                                                                                                                                 |
| 5 | P <sub>1S8S4S1</sub> | red   | P <sub>1</sub> – Band 4, 5, 8<br><b>P<sub>1S8</sub> – Band 2, 6</b> | <b>P<sub>1</sub> – Band 4, 6, 8</b><br>P <sub>1S5</sub> – Band 1 Knot 1<br>P <sub>2</sub> – Band 4, 6, 8<br>P <sub>3</sub> – Band 4, 6, 8<br>P <sub>4</sub> – Band 4, 6, 8                                                                                                      |
| 6 | P <sub>1S2</sub>     | ivory | <b>P<sub>1</sub> – Band 2, 6</b><br><b>P<sub>1S8</sub> – Band 4</b> | <b>P<sub>1</sub> – Band 1, 3, 6</b><br>P <sub>1S7</sub> – Band 1, 3<br>P <sub>1S8</sub> – Band 2, 4<br>P <sub>2</sub> – Band 1, 3, 6<br><b>P<sub>2S8</sub> – Band 1</b><br><b>P<sub>2S9</sub> – Band 2, 4</b><br>P <sub>3</sub> – Band 1, 3, 6<br>P <sub>4</sub> – Band 1, 3, 6 |
| 7 | P <sub>1S2</sub>     | ecru  | \                                                                   | \                                                                                                                                                                                                                                                                               |

*Multiband imaging*

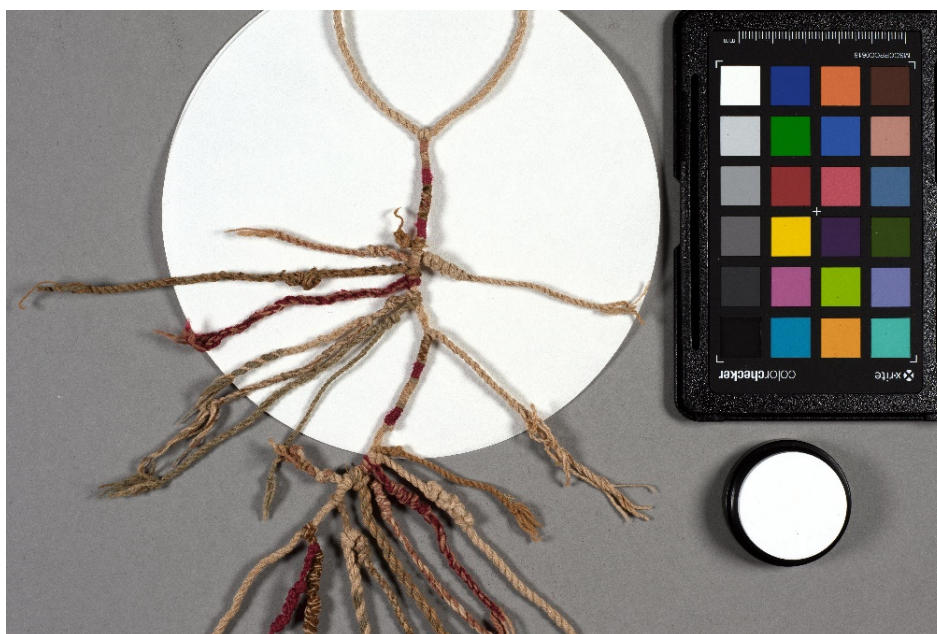

**Figure S1** Overview VIS image of Khipu 1932.08.0002

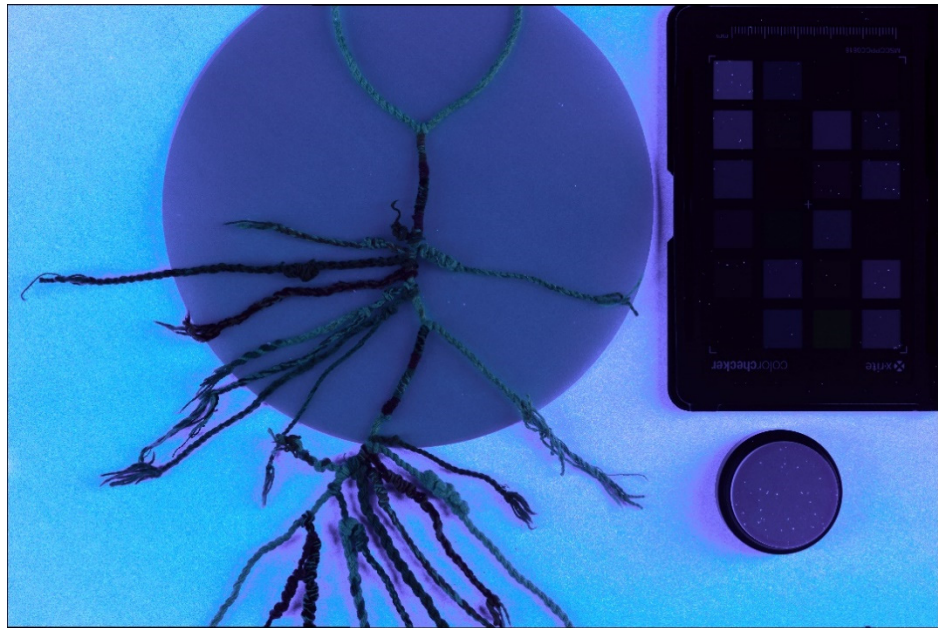

**Figure S2.** Overview UVL of Khipu 1932.08.0002

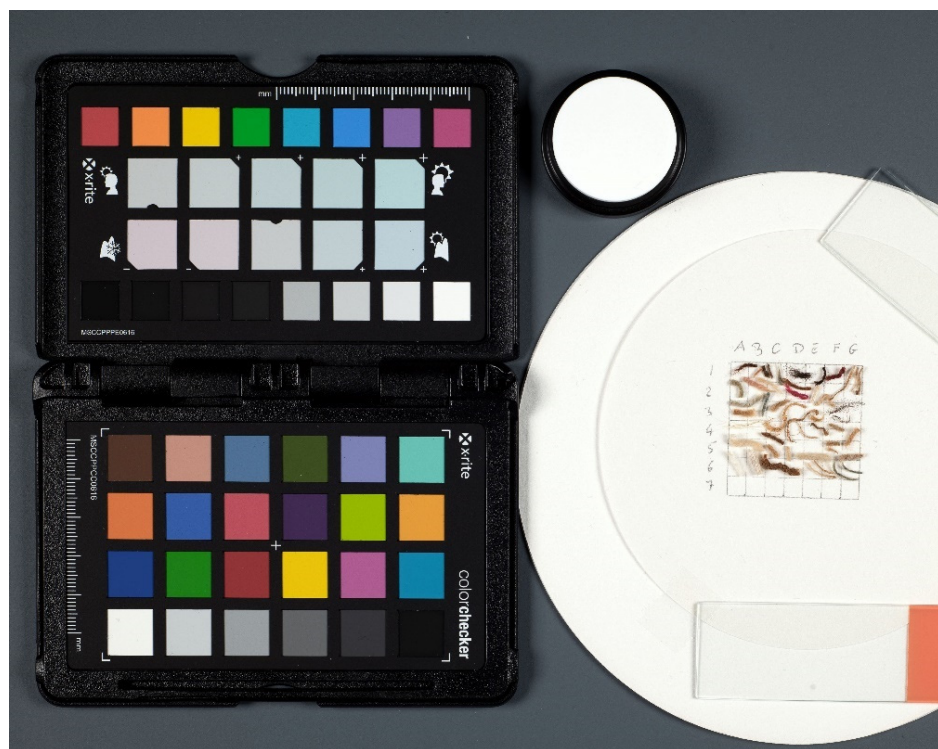

**Figure S3.** Overview VIS image of samples from the “Meaningful materials in the khipu code” project.

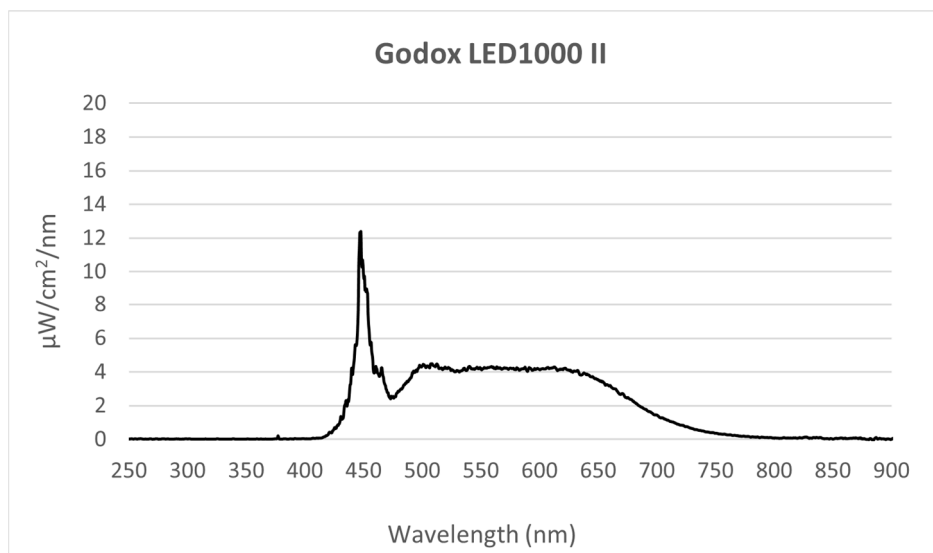

**Figure S4.** Irradiance of Godox LED 1000 II measured with an Ocean Optics Flame spectrometer at 100 cm distance.

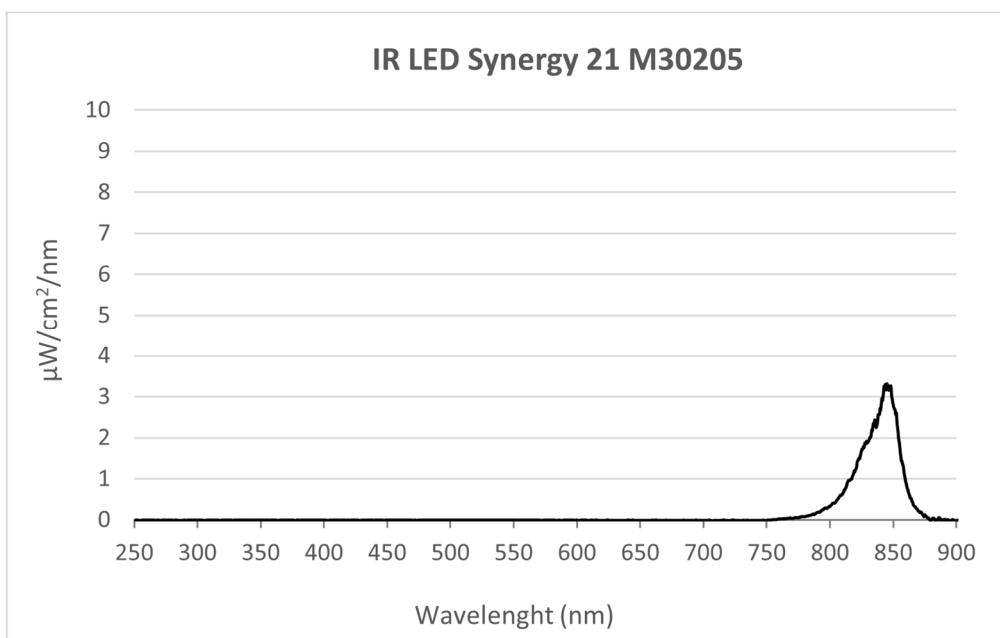

**Figure S5.** Irradiance of Godox LED 1000 II measured with an Ocean Optics Flame spectrometer at 100 cm.

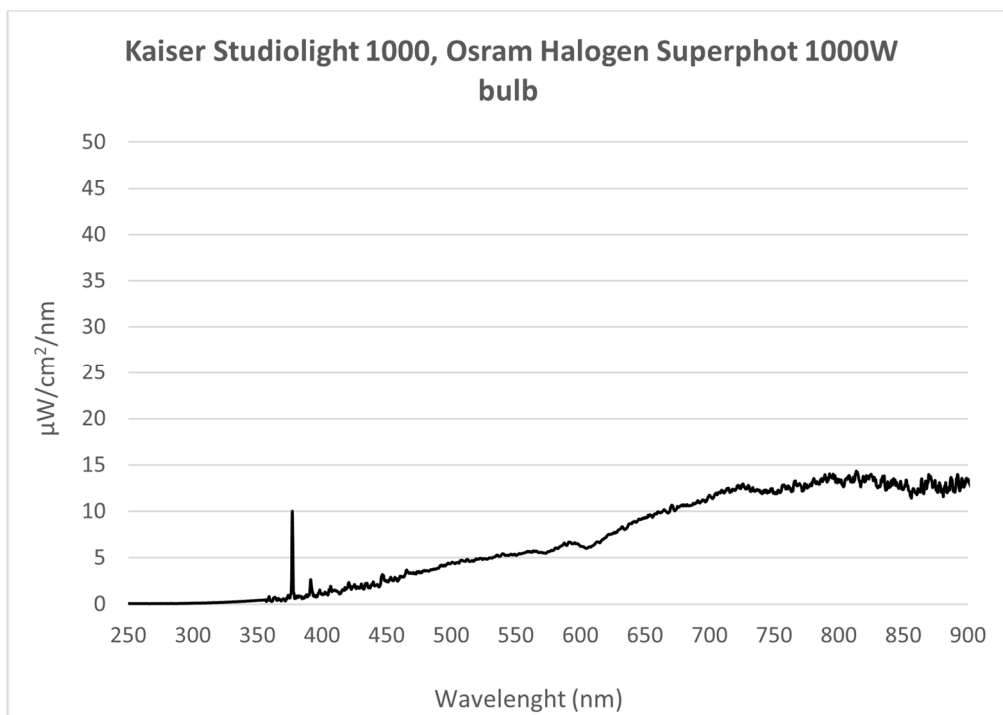

**Figure S6.** Irradiance of Kaiser Studioliight 1000 fitted with an Osram Halogen Superphot 1000W bulb measured with an Ocean Optics Flame spectrometer at 100 cm.

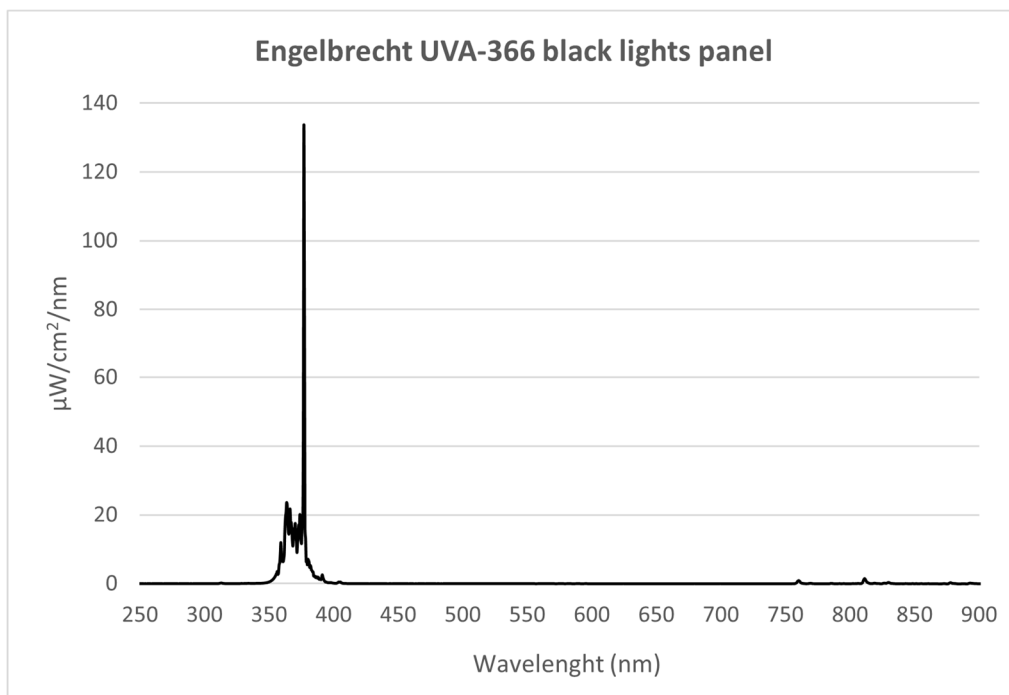

**Figure S7.** Irradiance of Engelbrecht UVA-366 black lights measured with an Ocean Optics Flame spectrometer at 100 cm.

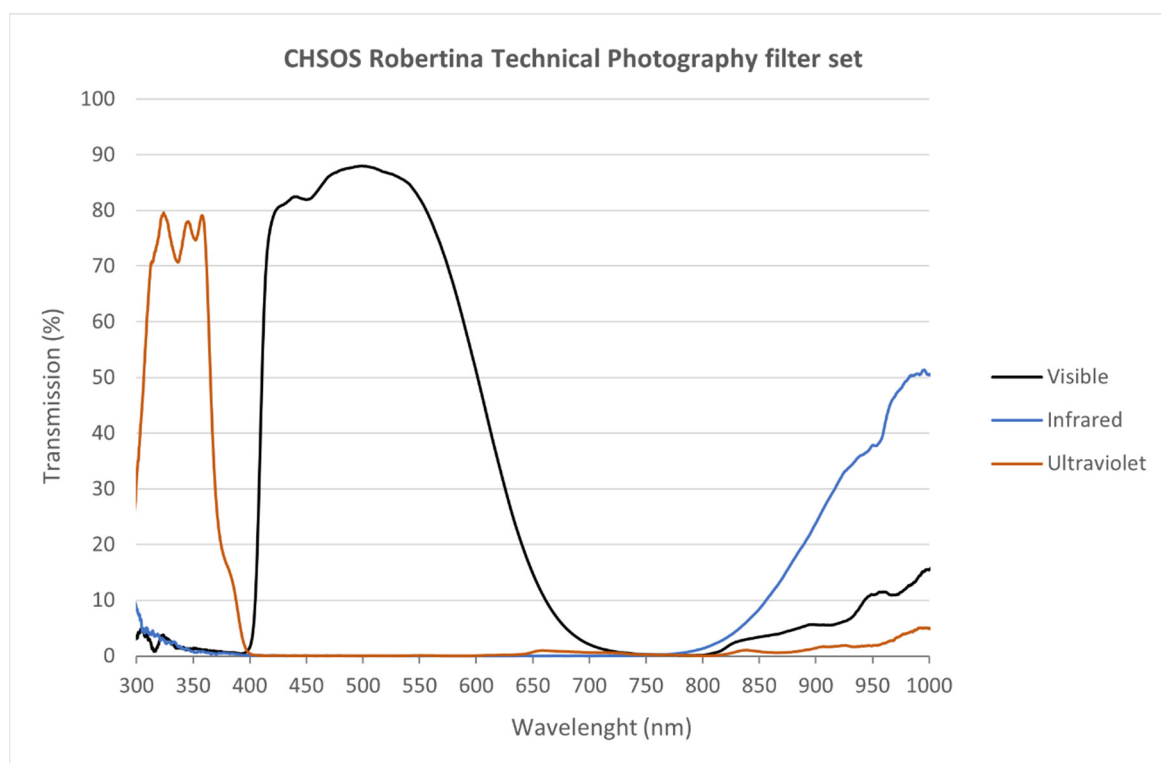

**Figure S8.** Transmission of CHSOS Robertina Technical Photography filter set [32]

#### XRF

**Table S4.** XRF positions and measurement details. A PDF report of all results is available from Zenodo [<https://doi.org/10.5281/zenodo.7387415>].

| XRF positions 1932.08.0001                                                                                                                   | Instrument settings                                                                                                                                                        | Comment                                                                  |
|----------------------------------------------------------------------------------------------------------------------------------------------|----------------------------------------------------------------------------------------------------------------------------------------------------------------------------|--------------------------------------------------------------------------|
| <p>P<sub>1</sub> multicoloured wrapping band 1-6 map</p> 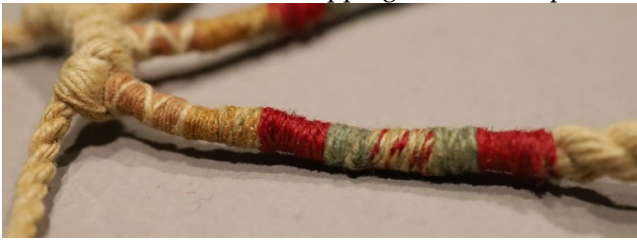 | <p>Live time: 10 s<br/> Length 22.95 mm<br/> Width 1.00 mm<br/> Area 22.72 mm<sup>2</sup><br/> Spot distance 0.09 mm<br/> Measurements 3072<br/> Time for scan 13:39 h</p> | <p>9 outliers with high levels of zinc, iron or copper were removed.</p> |
| <p>P<sub>1S3</sub> ivory-pink cord map</p> 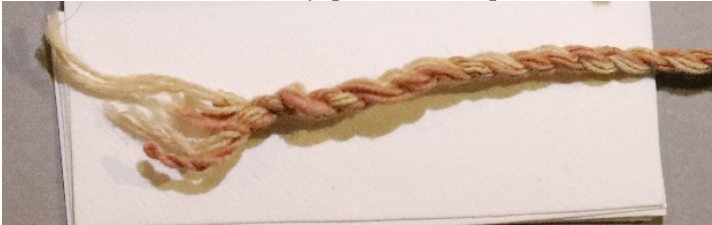               | <p>Live time: 10 s<br/> Length 1.30 mm<br/> Width 1.49 mm<br/> Area 1.82 mm<sup>2</sup><br/> Spot distance 0.10 mm<br/> Measurements 210<br/> Time for scan 0:56 h</p>     | <p>Uneven surface resulted in map with higher intensity on one end.</p>  |
| <p>P<sub>1S3</sub> ivory-pink points</p> 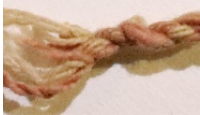                 | <p>Point analyses: 3 points on ivory threads and 3 points on pink threads<br/> Live time: 30 s</p>                                                                         |                                                                          |

| <p>P2s2 blue-ecru cord map</p> 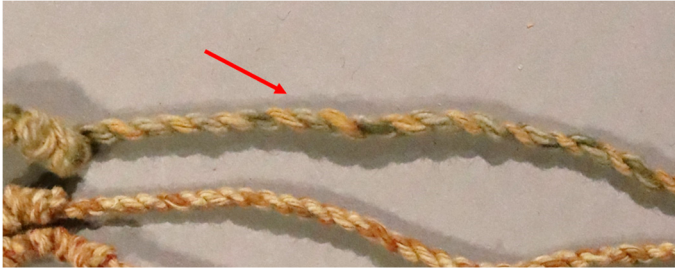            | <p>Live time: 10 s<br/>Length 4.14 mm<br/>Width 0.40 mm<br/>Area 1.49 mm<sup>2</sup><br/>Spot distance 0.09 mm<br/>Measurements 235<br/>Time for scan 1:02 h</p>     |                                                                                             |
|-----------------------------------------------------------------------------------------------------------------------------|----------------------------------------------------------------------------------------------------------------------------------------------------------------------|---------------------------------------------------------------------------------------------|
| <p>P2s8 ivory-pink wrapping map</p> 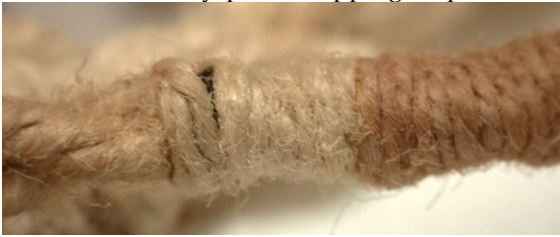       | <p>Live time: 10 s<br/>Length 11.79 mm<br/>Width 2.0 mm<br/>Area 23.34 mm<sup>2</sup><br/>Spot distance 0.09 mm<br/>Measurements 3036<br/>Time for scan 13:29 h</p>  | <p>Faulty motor movement caused slanted map</p>                                             |
| <p>P2s9 blue-ivory-pink wrapping map</p> 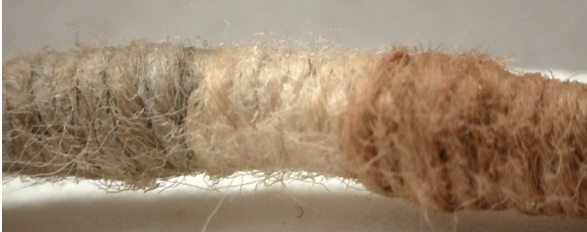 | <p>Live time: 10 s<br/>Length 6.80 mm<br/>Width 0.50 mm<br/>Area 3.4 mm<sup>2</sup><br/>Spot distance 0.10 mm<br/>Measurements 414<br/>Time for scan 1:50 h</p>      | <p>Faulty motor movement and uneven area resulted in a map largely out of focus.</p>        |
| XRF positions 1932.08.0002                                                                                                  | Instrument settings                                                                                                                                                  | Comment                                                                                     |
| <p>P1s8 multicoloured wrapping map</p> 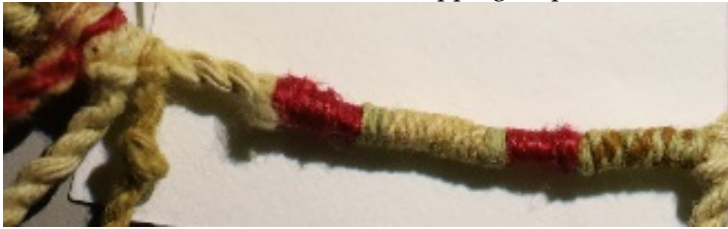  | <p>Live time: 10 s<br/>Length 0.90 mm<br/>Width 24.00 mm<br/>Area 21.60 mm<sup>2</sup><br/>Spot distance 0.10 mm<br/>Measurements 2410<br/>Time for scan 10:42 h</p> | <p>3 outliers with high levels of zinc, iron or copper were removed.</p>                    |
| <p>P1 pink-mottled wrapping map</p> 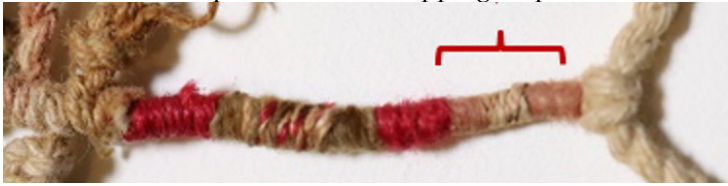     | <p>Live time: 10 s<br/>Length 5.00 mm<br/>Width 1.00 mm<br/>Area 5.00 mm<sup>2</sup><br/>Spot distance 0.10 mm<br/>Measurements 561<br/>Time for scan 2:29 h</p>     |                                                                                             |
| <p>P1s2 ecru-ivory points</p> 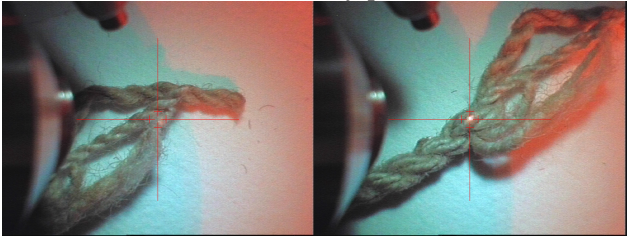           | <p>Point analyses: 3 points on ivory threads and 3 points on coloured threads<br/>Live time: 10 s</p>                                                                | <p>Point colour 1 missed the thread and resulted in a spectrum of the paper background.</p> |

## HPLC-HRMS

### Sample treatment

A mild extraction by dimethylformamide (DMF) and 0.1% Na<sub>2</sub>EDTA 1:1 (v/v) was applied to the micro-samples to extract the colored compounds present in the textiles studied. In detail, 200  $\mu$ L of solution were added to the sample; extraction was performed at 60 °C for 60 min in ultrasonic bath. The supernatant was filtered with PTFE filters (0.45  $\mu$ m) and injected in the chromatographic system.

### Chemicals

For sample treatment, ethylenediaminetetraacetic acid disodium salt (Na<sub>2</sub>EDTA, Fluka, USA) and dimethyl formamide (DMF, 99.8% purity, J.T. Baker, USA) were used as received.

The eluents used for the HPLC-ESI-Q-ToF analyses were water and acetonitrile, both LC-MS grade (Sigma-Aldrich, USA). All eluents were added with 0.1% v/v formic acid (FA; 98% purity, J.T. Baker, USA).

### Results

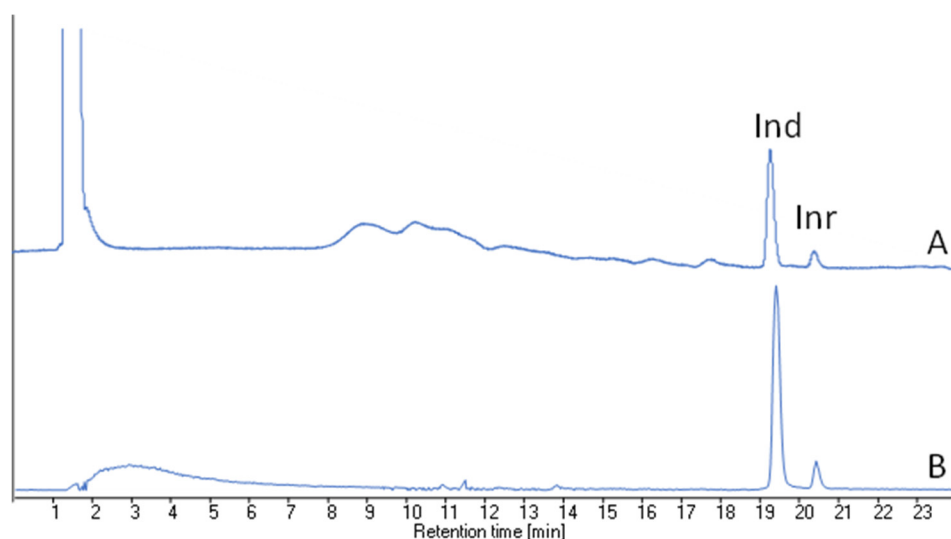

**Figure S9.** Chromatograms obtained for the extract of sample 1. A: HPLC-DAD chromatogram extracted at the maximum absorbance value in the range 550-650 nm; B: HPLC(+)-ESI Extracted Ion Chromatogram corresponding to the molecular ion of indigotin (Ind) and indirubin (Inr).

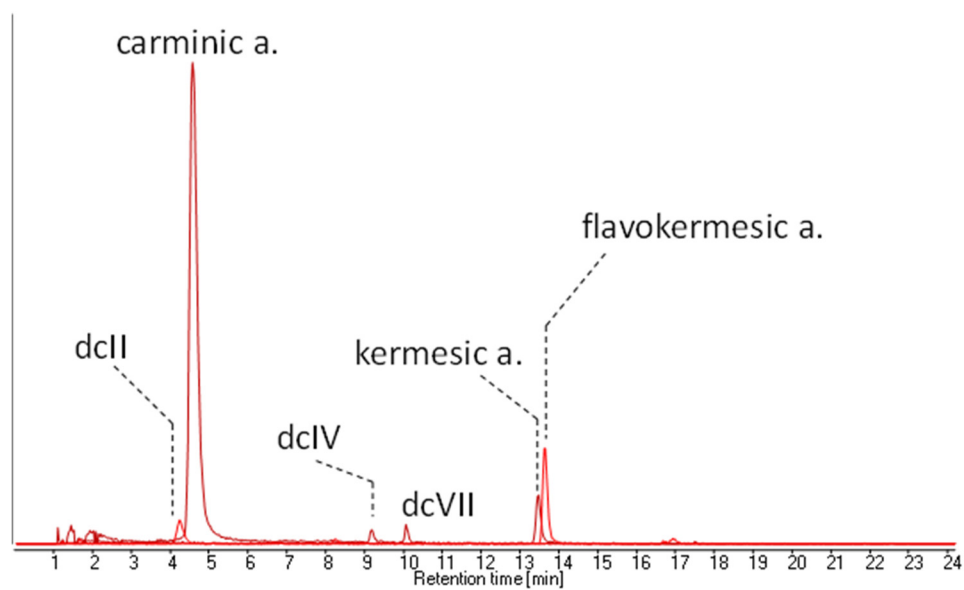

**Figure S10.** Chromatograms obtained for the extract of sample 2. HPLC(-)ESI Extracted Ion Chromatograms corresponding to the molecular ions of carminic, kermesic and flavokermesic acids, and the *Dactylopius coccus* markers dclI, dclIV and dcVII.

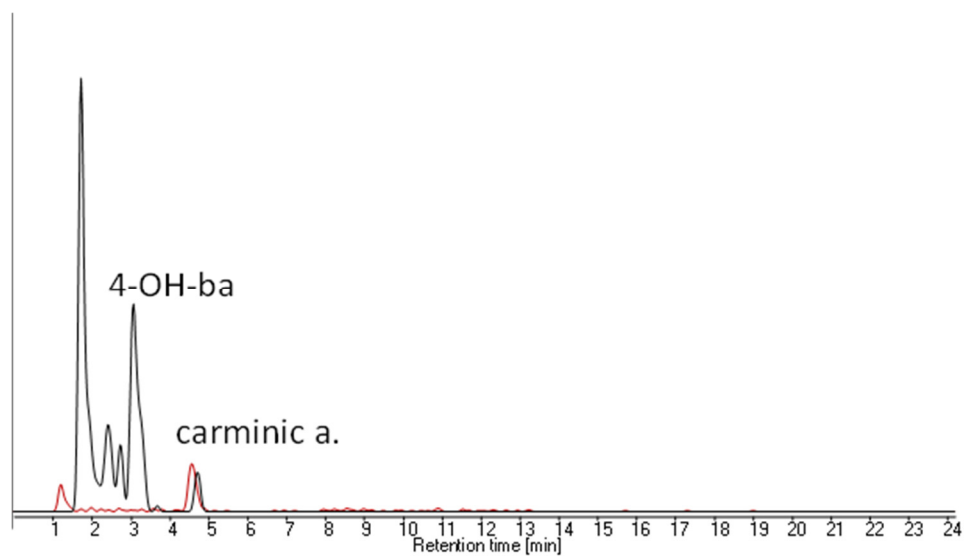

**Figure S11.** Chromatograms obtained for the extract of sample 4. HPLC(-)ESI Extracted Ion Chromatograms corresponding to the molecular ions of carminic acid and 4-hydroxybenzoic acid (4-OH-ba).

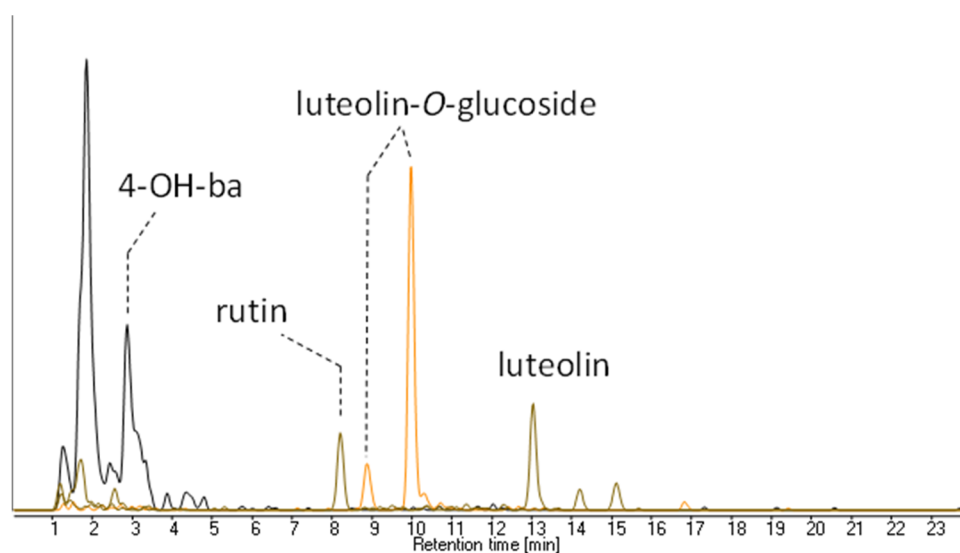

**Figure S12.** Chromatograms obtained for the extract of sample 7. HPLC(-)ESI Extracted Ion Chromatograms corresponding to the molecular ions of rutin, luteolin-O-glucoside, luteolin, and 4-hydroxybenzoic acid (4-OH-ba).
